# Supplementary material
Source: publisher site journal article supplement (https://www.dovepress.com/article/264595)
Supplement: Supplementary file 1 [file get_supplementary_file.php]

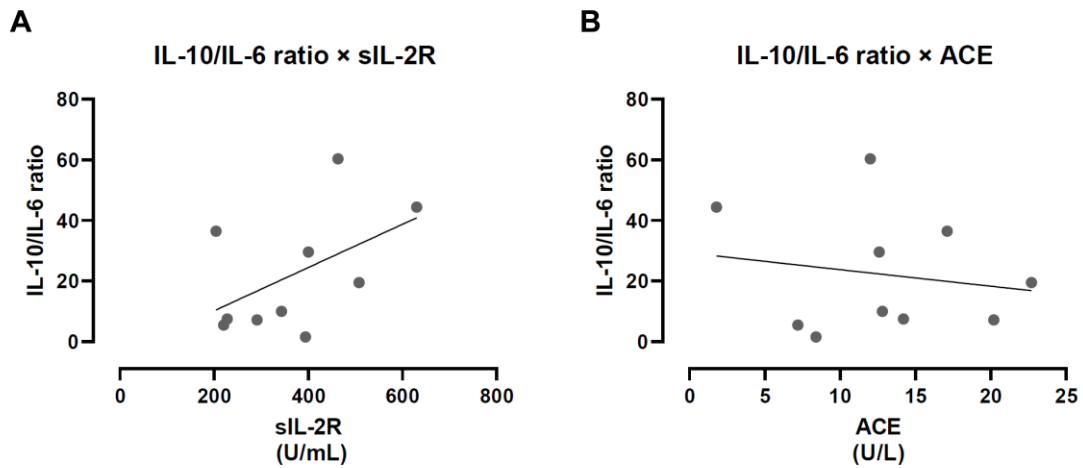

**Supplemental Figure 1. Correlation between the IL-10/IL-6 ratio and the serum level of sIL-2R or ACE in patients with PIOL**

A; Correlation between the IL-10/IL-6 ratio and the serum level of sIL-2R, B: Correlation between the IL-10/IL-6 ratio and the serum level of ACE. Two out of 12 patients could not undergo vitreous biopsy due to the sudden deterioration of the general condition and were diagnosed via positive cytology of the cerebrospinal fluid and the brain. A Spearman Rank correlation analysis was performed to assess the relationship between the IL-10/IL-6 ratio and the serum level of sIL-2R or ACE in patients with PIOL. No correlation of the IL-10/IL-6 ratio was observed with neither IL-2R ( $\rho = 0.454$ ,  $P = 0.19$ ) nor ACE ( $\rho = -0.030$ ,  $P = 0.93$ ).
